# Supplementary material
Source: HighWire-hosted journal article supplement (http://www.cmaj.ca/highwire/filestream/68580/field_highwire_adjunct_files/7/161485-res-7-at.pdf)
Supplement: 161485-res-7-at.pdf [file 161485-res-7-at.pdf]

**Appendix 7 (as supplied by the authors):** Propensity score distribution of treated (TNF-inhibitors) and referent (non-biologic) groups before (top panel) and after (bottom panel) weighting, Medicare cohort

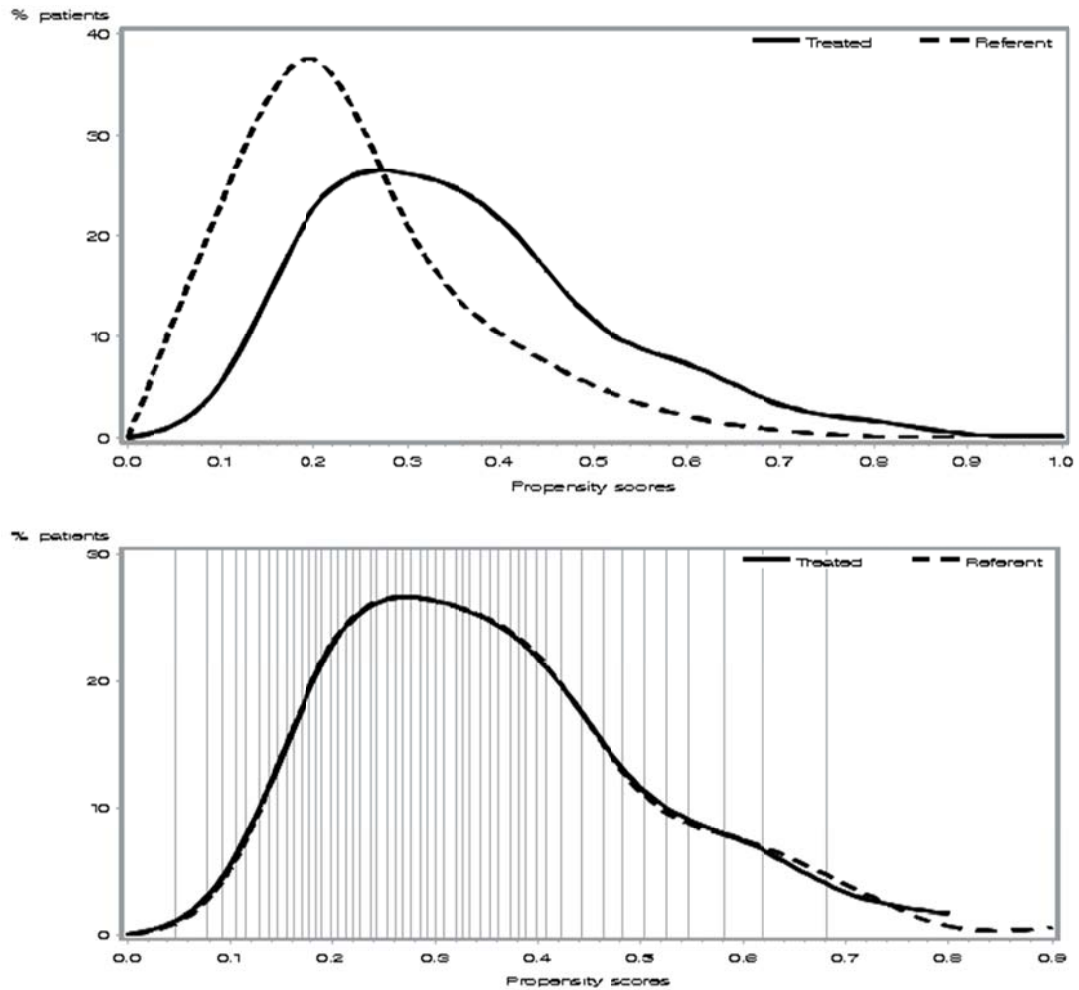

\* Vertical lines in the bottom panel indicate boundaries of propensity-score strata
